# Supplementary material for: Yeast translation elongation factor eEF3 promotes late stages of tRNA translocation
Source: PubMed Central journal article supplement (PMC7957392; doi:10.15252/embj.2020106449), 2021-02-08
Supplement: EMBJ-40-e106449-s007.pdf [file EMBJ-40-e106449-s007.pdf]

## Expanded View Figures

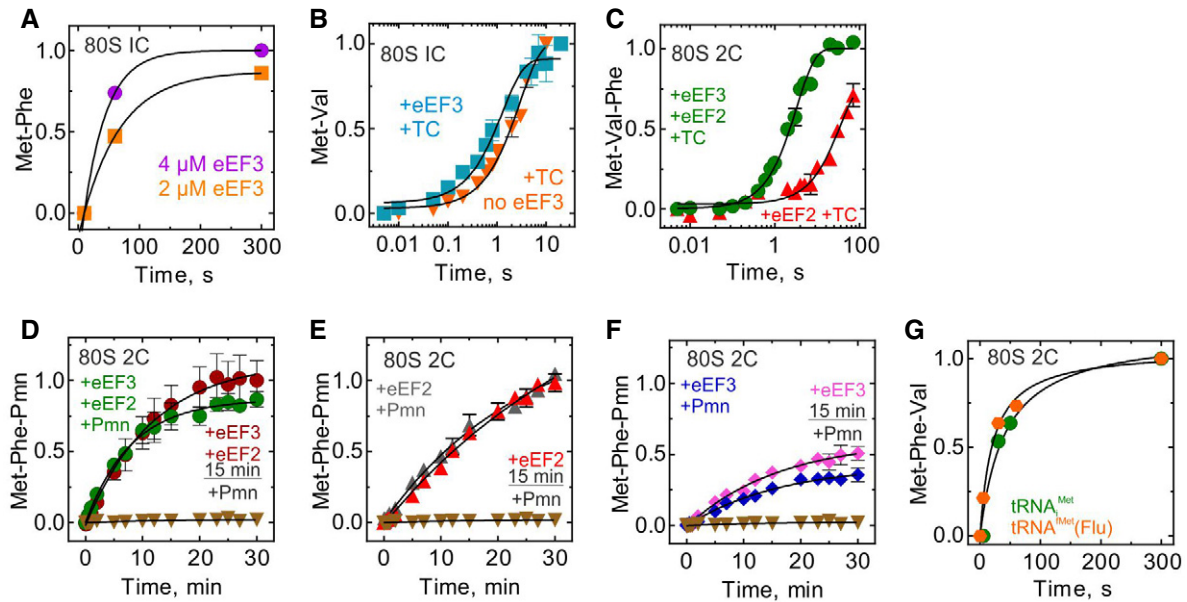

**Figure EV1. Di- and tripeptide formation.**

- A Time courses of MetPhe formation at different eEF3 concentrations. Data are normalized to Met-Phe formation in the presence of 4  $\mu$ M eEF3 with the maximum value in the dataset set to 1.
- B Met-Val formation monitored upon rapidly mixing initiation complexes (80S IC; 1  $\mu$ M) with ternary complexes eEF1A-GTP-[ $^{14}$ C]Val-tRNA<sup>Val</sup> (0.2  $\mu$ M) in the presence (cyan,  $0.78 \pm 0.1/s$ ) or absence (orange,  $0.34 \pm 0.03/s$ ) of eEF3 in a quench-flow apparatus, and the extent of peptide formation was analyzed by HPLC and radioactivity counting. Data are normalized to Met-Val formation in the presence of eEF3 with the maximum value in the dataset set to 1. Data presented as mean  $\pm$  SEM of  $n = 3$  biological replicates.
- C Met-Val-Phe formation upon rapid mixing of 80S complexes carrying MetVal-tRNA<sup>Val</sup> (80S 2C) with ternary complexes eEF1A-GTP-[ $^{14}$ C]Phe-tRNA<sup>Phe</sup> in the presence of eEF2 and eEF3 (green,  $0.3 \pm 0.02/s$ ), eEF2 (red,  $0.03 \pm 0.006/s$ ). Data are normalized to Met-Val-Phe formation in the presence of eEF2 and eEF3 with the maximum value in the dataset set to 1. Data presented as mean  $\pm$  SEM of  $n = 3$  biological replicates.
- D-F Comparison of time courses of 80S 2C reaction with Pmn. 80S 2C complexes with MetPhe-tRNA<sup>Phe</sup> in the presence of eEF2 and eEF3 (D), eEF2 (E) or eEF3 (F), or in the absence of eEF2 and eEF3 (brown triangles), with Pmn in a quench-flow apparatus. As indicated, the reaction was started either by mixing all components, or by addition of Pmn to a mixture of 80S 2C with the factors preincubated for 15 min. The extent of MetPhe-Pmn formation was analyzed by HPLC and radioactivity counting. Data are normalized to Met-Phe-Pmn formation in the presence of eEF2 and eEF3 (D), eEF2, (E) or eEF3 (F) with the maximum value in the dataset set to 1. Data presented as mean  $\pm$  SEM of  $n = 3$ . For comparison, data from Fig 2B are plotted.
- G Met-Phe-Val formation upon rapid mixing of 80S complexes carrying either [ $^3$ H]Met-tRNA<sup>Met</sup> (green) or [ $^3$ H]Met-tRNA<sup>Met(Flu)</sup> (orange) MetPhe-tRNA<sup>Phe</sup> (80S 2C) with ternary complexes eEF1A-GTP-[ $^{14}$ C]Val-tRNA<sup>Val</sup> in the presence of eEF2 and eEF3. Data are normalized to Met-Phe-Val formation in the presence of non-labeled initiator tRNA (green) with the maximum value in the dataset set to 1.

Source data are available online for this figure.

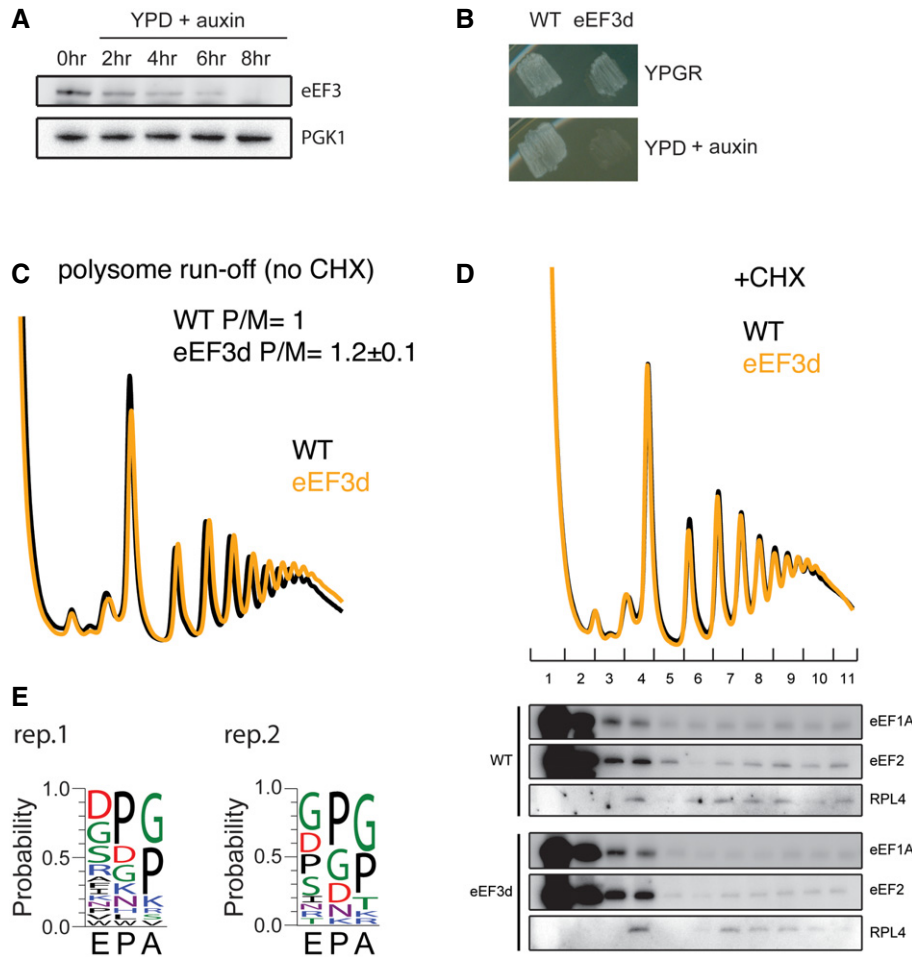

**Figure EV2. Analysis of *in vivo* ribosome functional states by ribosome profiling.**

- A Immunoblot of eEF3 depletion over time. Same amount of cells were harvested at indicated time points, lysed, and subjected to immunoblotting using antibodies against eEF3 or PGK1.
- B Growth of WT and eEF3d cells on YPGR and YPD + auxin plates. Plates were incubated at 30°C for 1 day.
- C Representative run-off polysome profiles for WT and eEF3d strains. Polysome-to-monomer ratios (P/M) are normalized to WT ratios. Data are presented as mean ± SD, *n* = 2.
- D Polysome profiles from WT or eEF3d cells with CHX added during cell lysis to stop translation (top). Fractions were analyzed by immunoblotting using antibodies against eEF1A, eEF2, or RPL4 (bottom).
- E De-enriched peptide motifs associated with ribosome pausing at the E, P, and A sites in the absence of eEF3. Peptide motif logos from two biological replicates are shown.

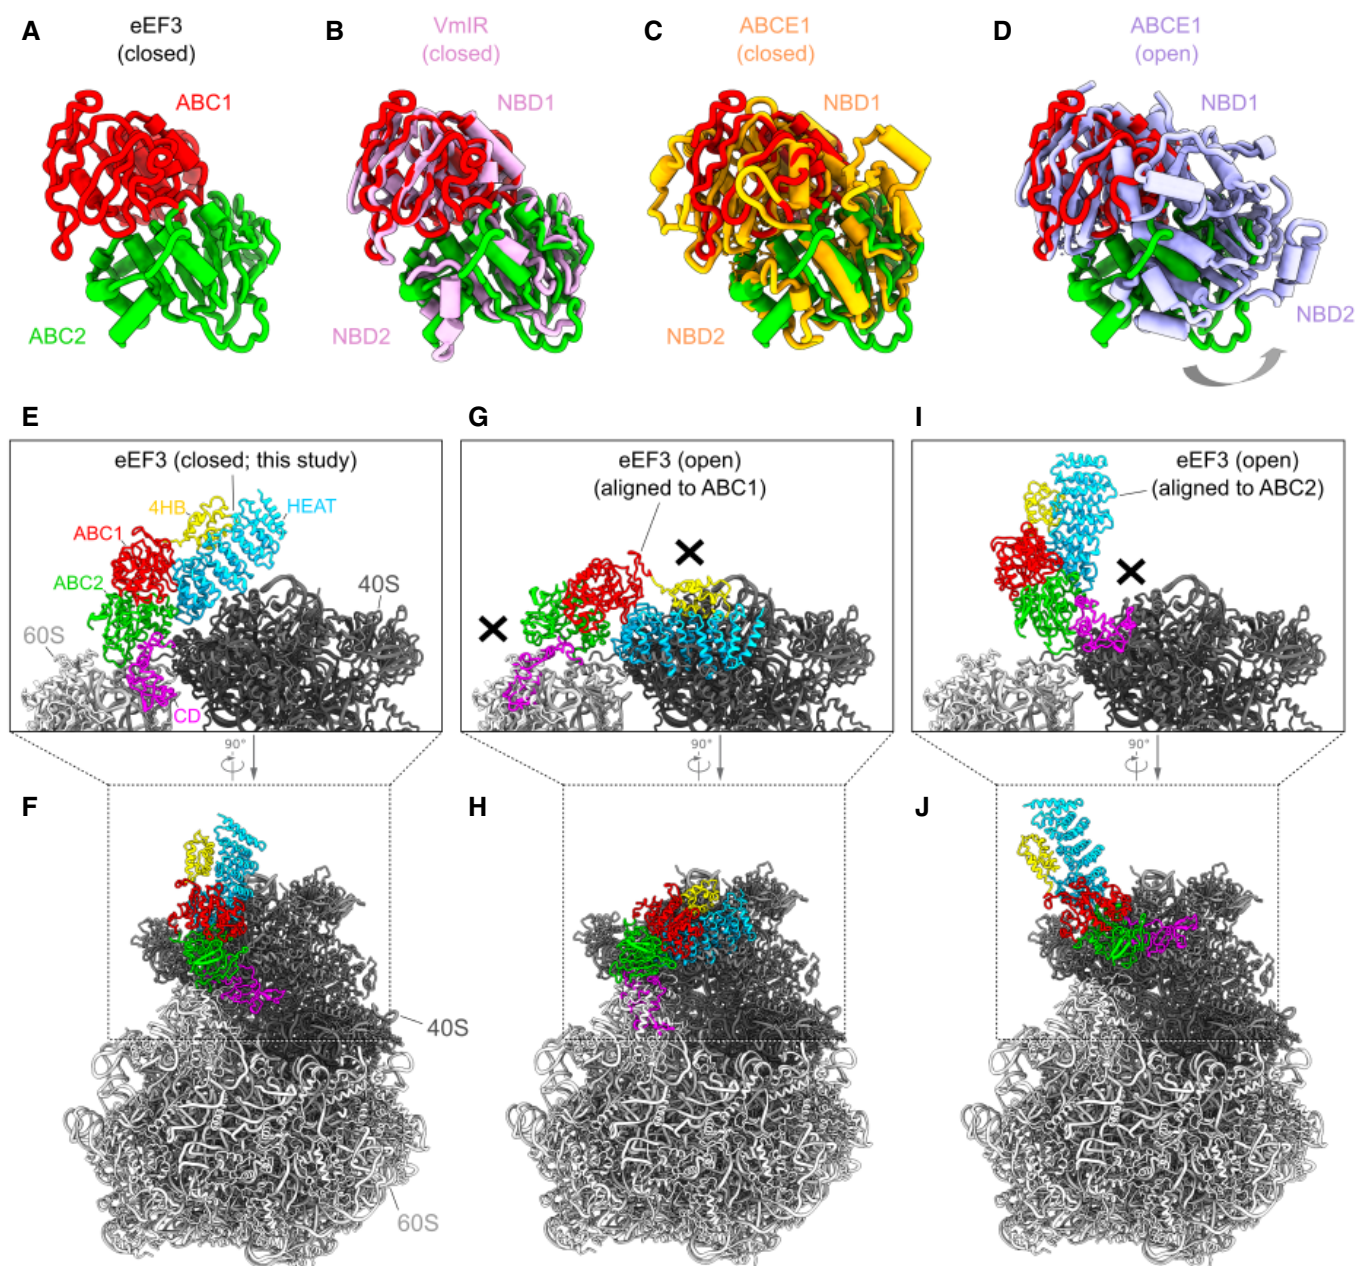

**Figure EV3. The closed and open conformations of eEF3.**

The closed and open conformations of eEF3

A The ABC1 (red) and ABC2 (green) domain of eEF3 in the eEF3-80S complex.

B–D Conformation of the eEF3 NBDs with respect to other ABC proteins. Alignment (based on ABC1) of the eEF3-ABCs with (B) the closed conformation of the NBDs of the *B. subtilis* ABCF ATPase VmIR (pink, PDB: 6HA8) (Crowe-McAuliffe et al, 2018), (C) the closed conformation of the archaeal ABCE1-30S post-splitting complex (orange, PDB: 6TMF) (Nureberg-Goloub et al, 2020), and (D) the *E. coli* ABCE1 protein observed in the open conformation (violet, PDB ID: 3OZX) (Barthelme et al, 2011).

E, F The eEF3 model in a closed conformation colored due to its different domain organization.

G–J Incompatibility of eEF3 to the 80S ribosome in a potential opened conformation. The eEF3 model was aligned to (G, H) ABC1 or (I, J) ABC2 of the ABCE1 protein in an opened conformation (PDB ID: 3OZX) (Barthelme et al, 2011).

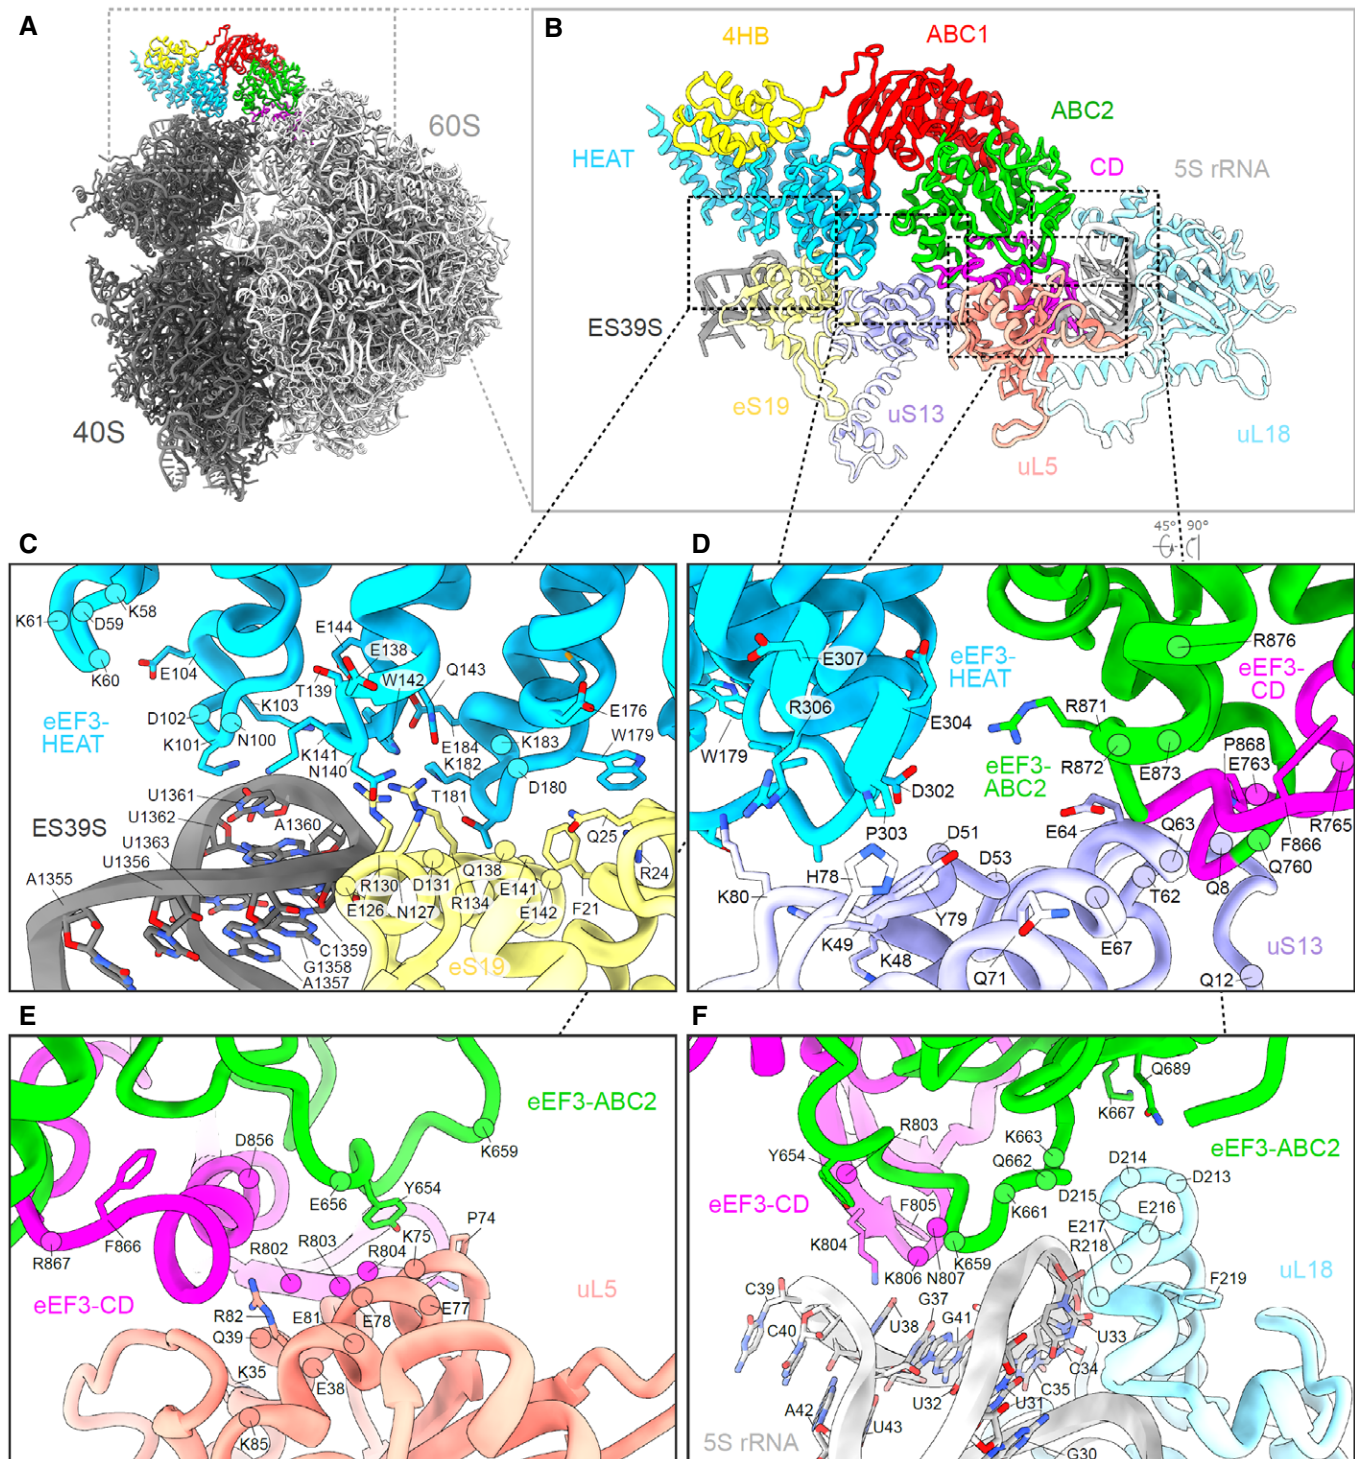

**Figure EV4. Interactions of eEF3 with the 80S ribosome.**

**A, B** (A) Overview of the eEF3-80S molecular model with (B) zoom on the eEF3 model (colored by domain) interacting with ribosomal components.

**C** Interactions of the eEF3-HEAT (blue) with ES39S of the 18S rRNA (dark gray) and eS19 (pale yellow) of the SSU.

**D** The 40S protein uS13 (violet) forms bridging contacts with the HEAT (blue), ABC2 (green), and CD (magenta) domains of eEF3.

**E, F** The eEF3-CD and eEF3-ABC2 interact with (E) the LSU protein uL5 (coral) and (F) the 5S rRNA (light gray) and uL18 (pale blue).

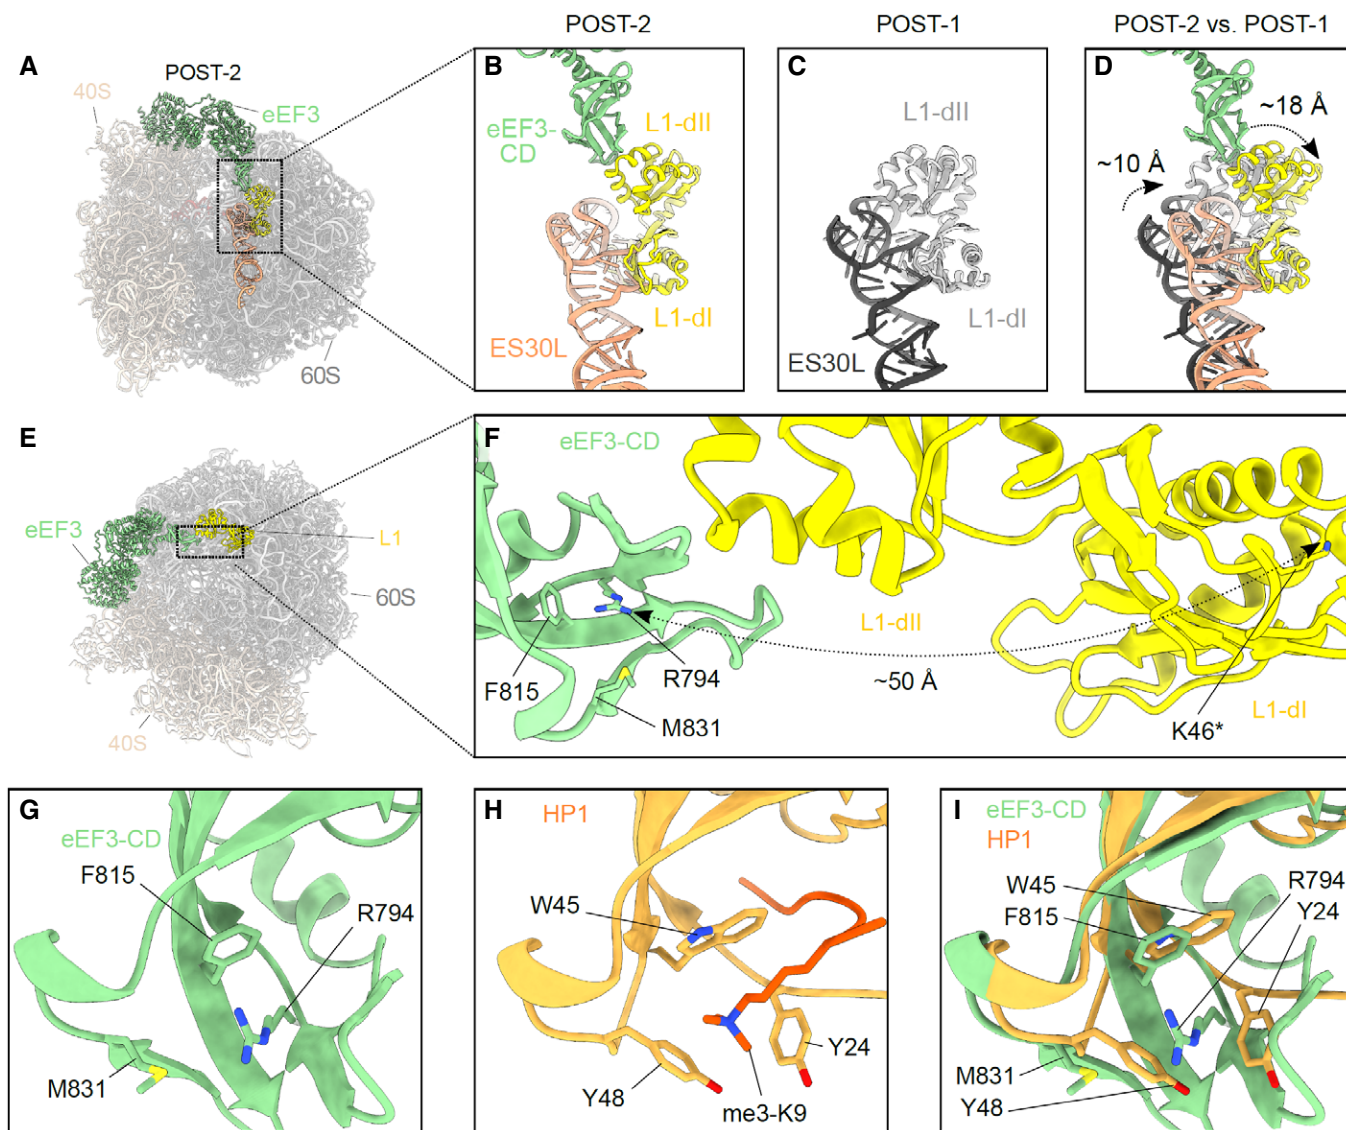

**Figure EV5. The hydrophobic pocket of the eEF3 CD.**

- A, B (A) Overview of the POST-2 eEF3-80S molecular model (B) highlighting the position of eEF3-CD (green) relative to L1 protein (yellow) and ES30L (orange).
- C, D (C) Same as (B) but for POST-1, and (D) comparison of (B) and (C) depicting the magnitude of the L1-stalk movement from the POST-2 state (L1-stalk'int') to the POST-1 state (L1-stalk'in'). L1-POST1 (light gray), ES30L-POST1 (dark gray).
- E, F (E) eEF3-80S molecular model highlighting eEF3 (pale green) and the L1 protein (yellow) and its (F) zoom showing the magnitude of the distance between the eEF3-CD hydrophobic pocket (based on the alignment with HP1 shown in (I)) and the K46 of the L1-dI. K46\* labels the lysine, which is getting methylated by the Seven-β-strand methyltransferase (Webb et al, 2011).
- G, H (G) The eEF3-CD hydrophobic pocket based on the alignment with (H) the *D. melanogaster* HP1-CD.
- I Overlay of the eEF3 and HP1 CD based on their sequence.
